# Supplementary material
Source: Springer Nature journal article supplement (https://www.springermedizin.de/resource/supplementary/13256_2009_938_MOESM6_ESM.pdf/9646858)

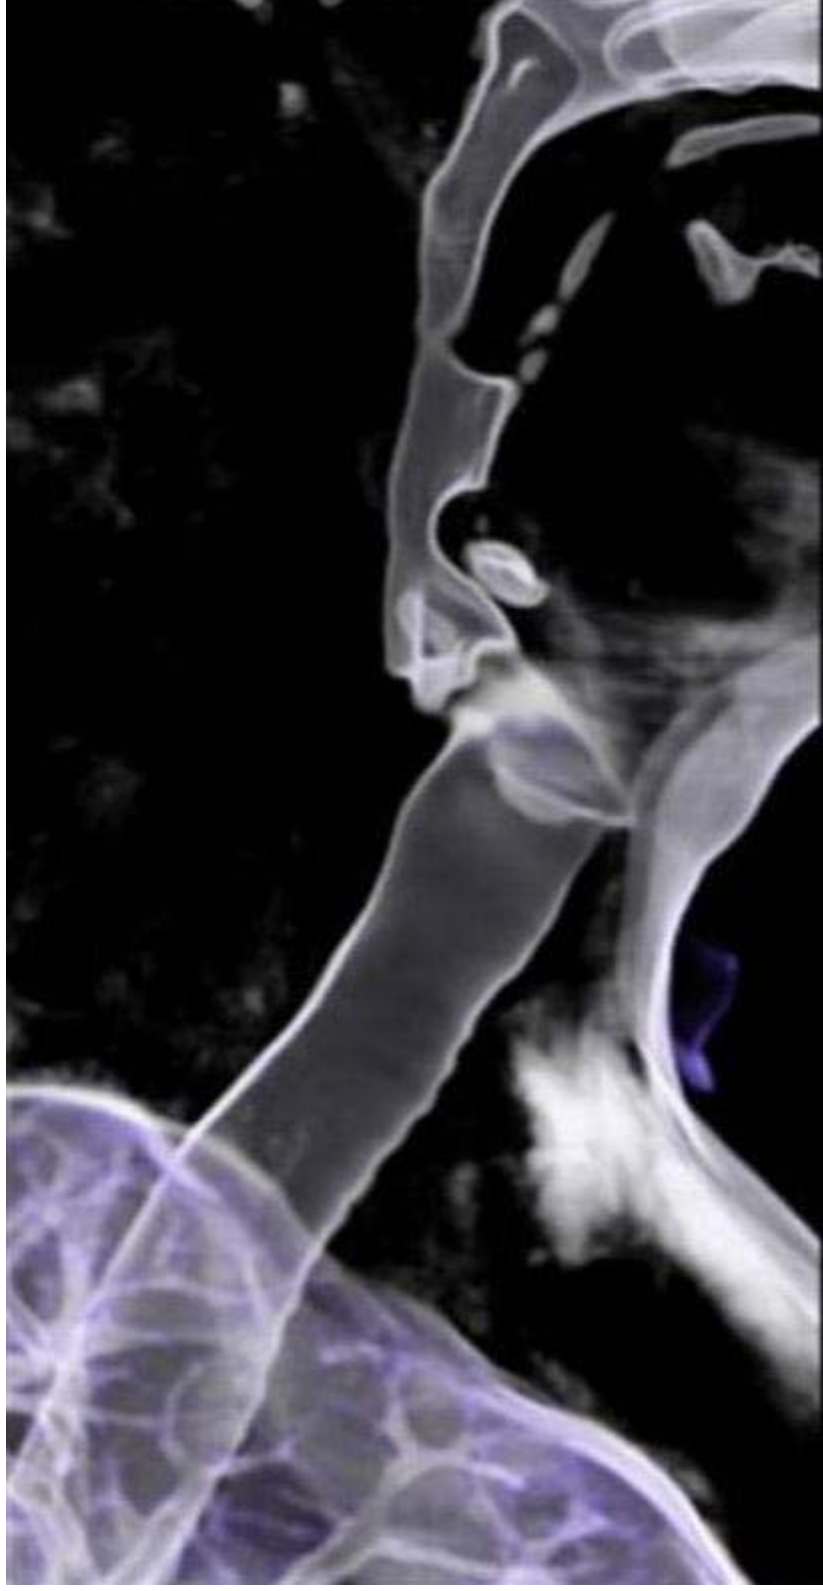

Supplement: MOESM6 [file 9646858]
